1 **Live and inanimate predator-associated cues suppress the population of sap-feeding prey and**  
2 **induce polyphenism**

3 Mouhammad Shadi Khudr<sup>1</sup>, Tabea Dobberke<sup>2\*</sup>, Oksana Y. Buzhdygan<sup>2\*</sup>, Susanne Wurst<sup>2,3</sup>

4  
5 <sup>1</sup>Faculty of Biology, Medicine and Health, The University of Manchester, Michael Smith Building,  
6 M13 9PT, Manchester, UK

7 <sup>2</sup>Institute of Biology, Freie Universität Berlin, Königin-Luise-Straße 2-4, 14195 Berlin, Germany

8 <sup>3</sup>Berlin-Brandenburg Institute of Advanced Biodiversity Research (BBIB), D-14195 Berlin, Germany

9  
10 \*These two authors contributed equally to the work and should be considered joint second author.

11 Corresponding author: Mouhammad Shadi Khudr Email: [scholia\\_1@tutanota.com](mailto:scholia_1@tutanota.com)

12  
13 **Running title:** Predator-associated risk cues suppress prey population

14  
15  
16  
17  
18 **Declarations**

19  
20 **Conflict of interests**

21 None declared.

22 **Funding**

23 This work received funding from the Freie Universität Berlin for MSK. OYB was funded by the DRS  
24 Point Fellowship, Freie Universität Berlin.

25 **Author contributions**

26 All authors contributed critically to the drafts and gave final approval for publication.

27 **MSK** designed the experiment, co-executed the experimental work with TD, co-shaped and co-  
28 optimised the analysis with OYB, co-built the illustrations with TD, and expanded the manuscript and  
29 improved the visualisation.

30 **TD** executed the experimental work with MSK, did the data entry in collaboration with MSK,  
31 provided the first drafts of this manuscript with illustrations, produced the bibliography. TD co-wrote  
32 the manuscript with MSK.

33 **OYB** contributed to the enhancement of the experimental design, accomplished the analysis with MSK,  
34 provided insights on the refinement and polishing of the visualisation and contributed to the writing up  
35 and enhancement of the manuscript.

36 **SW** hosted the work, provided suggestions for the optimisation of the experimental design and  
37 contributed to the enhancement of the writing up of the manuscript.

38  
39

40 **Abstract**

41 Non-consumptive effect of predation is a well-researched subject of which certain non-consumptive  
42 and predator-mimetic facets are yet to be investigated in plant-parasite systems.

43 One clone of the green peach aphid *Myzus persicae* (Sulzer), raised on a model crop *Brassica*  
44 *oleracea* (L.), was exposed to different regimes of risks associated with ladybird *Coccinella*  
45 *septempunctata* (L.). This encompassed consumption, consumption alternated by non-consumptive  
46 effects, isolated predators, dead predator, predator dummy, as well as dummy, plants or soil cued with  
47 predator-borne suspension, and predator removal (exposure to plants previously visited and marked by  
48 a predator).

49 Over time, the respective risk regimes variably negatively impacted the prey population; the corpses,  
50 cued plants and dummies had considerable persistent negative effects on aphid reproductive success,  
51 contrary to the observation under predator removal. By the end of the experiment, polyphenism  
52 (winged morph production) also differed and was animated under the presence of a starved isolated  
53 predator; but faded when a predator corpse was present; and vanished under the dummy.

54 Our findings, in this model aphid-crop system, contribute to the rapidly developing area of the ecology  
55 of fear, as we provide insights and novel means for aphid management that merit further examination  
56 across different eco-agricultural contexts.

57

58

59 **Keywords**

60 *Myzus persicae*, *Coccinella septempunctata*, fear of predation, non-consumptive effects, green peach  
61 aphid, ladybird

62

63

64

65

66

67

68

69

70

## 71 **Introduction**

72           Across natural and agricultural ecosystems, the impact of predation on the population dynamics  
73 and survival of prey is multifaceted. It takes place in the form of direct consumption and also occurs  
74 non-consumptively via fear of predation or intimidation (Lima 1998; Preisser et al. 2005; McCauley et  
75 al. 2011; Zöttl et al. 2013; Kersch-Becker and Thaler 2015). This can be in effect through different  
76 types of stimulation, such as the presence of impaired predators (i.e., predators altered experimentally  
77 to no longer consume the prey) (Nelson et al. 2004; Nelson and Rosenheim 2006), mere predator  
78 presence (McCauley et al. 2011; Kersch-Becker and Thaler 2015), and predation risk including  
79 induction by predator-borne cues (Preisser and Bolnick 2008; Ferrari et al. 2010; Ninkovic et al. 2013;  
80 Khudr et al. 2017).

### 81 *Information cues in action*

82           The prey assess multiple cues and info-chemicals from their surroundings, including stimuli  
83 associated with their natural enemies (Lima and Dill 1990; Kats and Dill 1998; Lima and Steury 2005;  
84 Ferrari et al. 2010). Inducible prey defences after perception of environmental risk have been reported  
85 to be changeable relevant to the risk perceived and hence can be adjustable and adaptive (e.g., through  
86 transgenerational effects in aphids) (Keiser and Mondor 2013), as they may lead to fitness gains  
87 (Evans and Schmidt 1990; Coslovsky and Richner 2011; Zöttl et al. 2013). Responses to predation risk  
88 may span feeding cessation, escape and avoidance of predators (Nelson 2007; Keiser and Mondor  
89 2013), dispersion (Roitberg et al. 1979, Nelson and Rosenheim 2006, Hatano et al. 2010), and  
90 habituation to risk (Shalter 1984; Holomuzki and Hatchett 1994). Also, prey reproductive success may  
91 undergo inhibition, or reproduction may be altered under intimidation by predators (Preisser et al. 2005;  
92 McCauley et al. 2011), alarm pheromone effects (de Vos et al. 2010), and due to behavioural changes  
93 (Nelson et al. 2004; Hoki et al. 2014). The effects brought about by predator cues (Norin 2009) diffuse  
94 through the aphid population and intensify because of communication by way of pheromones (de Vos  
95 et al. 2010; Keiser 2012, Ingerslew and Finke 2017), thereby inducing forms of phenotypic plasticity  
96 such as alata production (Weisser et al. 1999), or changes in reproductive success, or both (Khudr et al.  
97 2017). Whichever choice the prey make, the decision of developing anti-predator responses and  
98 reacting to environmental risks incur an ecological cost (Agabiti et al. 2016; Hermann and Landis 2017;  
99 Ingerslew and Finke 2017), leading generally to compromised prey fitness and altered dynamics and  
100 behaviours (Lima and Dill 1990; Sih 1994; Sih 1997; Nelson et al. 2004; Preisser et al. 2005) to the  
101 advantage of survival (Francke et al. 2008; Keiser 2012). Using isolated predators or inanimate objects  
102 cued by predator info-chemicals as a form of risk to affect parthenogenetic phloem-feeding insects has

103 not received enough attention compared to the effects of the employment of impaired predators  
104 (Nelson et al. 2004; Nelson and Rosenheim 2006). The lingering question remains, however, on what  
105 sensory modalities are the most important in affecting prey perception of predation risk and shaping  
106 prey response to the risk over time.

#### 107 *Brevity versus longevity of non-consumptive effects*

108 The evidence for the wide-spread impact of fear of predation is mounting across a vast array  
109 of taxa (Preisser et al. 2005; Hermann and Landis 2017). However, the current understanding of the  
110 role of the duration of risk exposure on how non-consumptive effects influence the biology of  
111 phloem-feeding insects is meagre, but see (Van Dievel et al. 2016). Prolonged or more frequent  
112 exposure to high frequencies/intensities of risk imposed by natural enemies can cause a state of  
113 environmental uncertainty for the prey (Sih 1992; Koops 2004; Trussell et al. 2011) that may dilute the  
114 strength of non-consumptive effects over time. This may alter the assessment of risk by the prey and  
115 concomitant prey responses against risk cues and thus may eventually induce prey habituation to risk,  
116 which can be contextual and contingent on prey physiology and energy dynamics (Trussell et al. 2011;  
117 Matassa and Trussell 2014). Moreover, unlike older predator-borne cues, fresh ones might be  
118 associated with higher localised risk and could then provide more certainty/reliability resulting in  
119 faster and more adaptive prey responses (Dixon and Agarwala 1999; Podjasek et al. 2005; Keiser and  
120 Mondor 2013) which could reduce ecological costs (Koops 2004; Ninkovic et al. 2013; Zöttl et al.  
121 2013). Nevertheless, temporal aspects of anti-predator responses remain obscure, including whether  
122 and how constant versus fluctuating risks may affect prey population dynamics in the short and the  
123 long term (Lima and Bednekoff 1999; Hamilton and Heithaus 2001).

124 The intensity and consistency of the effects of predator-borne cues, when consumption and/or  
125 non-consumptive effects change through time, may result in trait-mediated prey responses; the effect  
126 of which may scale up through ecosystems (Lima and Bednekoff 1999, Steffan and Snyder 2010;  
127 Matassa and Trussell 2014). To date, comprehensive studies on profiling reproductive success and  
128 phenotypic plasticity of parthenogenetic phloem-feeding prey under respective exposure to an array of  
129 non-consumptive risk types over a given period are scarce. Although prey intimidation by the constant  
130 presence of an isolated predator (non-consumptive effects) has been demonstrated before in insects  
131 (e.g., dragonfly) (McCauley et al. 2011), this has never been sufficiently tested over a generation time  
132 in the presence of isolated predators or especially when different types of inanimate predator-imitating  
133 cues are applied in model crop-aphid systems.

134 *Inducible defences and non-consumptive effects via biomimicry*

135 Under favourable mesic conditions, the population of parthenogenetic phloem-feeding aphids  
136 comprises female congeners with very strong maternal/transgenerational effects (Mousseau and Fox  
137 1998; Weisser et al. 1999; Hu et al. 2018). Responses to environmental stimuli become escalated by  
138 maternal preconditioning of daughters and granddaughters by means of telescoping generations  
139 (Kindlmann and Dixon 1989), as consecutive generations of offspring may develop and become  
140 preconditioned simultaneously (Mousseau and Fox 1998; Weisser et al. 1999; Hu et al. 2018), leading  
141 for instance to the production of winged aphids (alates, dispersive morphs) (Weisser et al. 1999;  
142 Kunert et al. 2005). The latter is an anti-predator trait of phenotypic plasticity; a polyphenic response  
143 to predation risk (Dixon and Agarwala 1999; Mondor et al. 2005); alates disperse to settle aside from  
144 the adverse circumstances that induced their generation (Dixon and Agarwala 1999; Kunert and  
145 Weisser 2003; Mondor et al. 2005).

146 Ladybirds are effective in aphid biocontrol (Hoki et al. 2014), particularly in greenhouse  
147 settings (Riddick 2017), and their footprints are known to elicit avoidance behaviour in aphids  
148 (Ninkovic et al. 2013). Aphids, mainly chemically detect the presence of ladybirds (e.g., *Coccinella*  
149 *septempunctata*) through exposure to the tracks and excretions left by the predator (Ninkovic et al.  
150 2013), with evidence for sex-dependency as well as concentration effects of ladybird olfactory cues on  
151 aphid response (Youren 2012). Roitberg et al. (1979) reported that coccinellid predation risk induced  
152 aphids to scatter on plants and in between plants, which was followed by reduced reproductive success,  
153 indicating energy costs, allocated for the preconditioning of progeny (escapees), at the expense of  
154 reproduction (Mackay and Wellington 1975; Roitberg et al. 1979; Keiser and Mondor 2013).  
155 Furthermore, Fievet et al. (2008) demonstrated that exposure to indirect cues in the form of dead  
156 conspecifics due to predation induced behavioural changes that were accompanied by a decline in the  
157 aphid population. A relation between reduced feeding time and dwindling reproductive success (Sih  
158 1992) has been described by Nelson (2007), as well. The reduction of feeding time was related, in the  
159 cited work, to predator disturbance frequency, where the presence of non-consumptive (impaired)  
160 predators led to reduced aphid fitness (Nelson et al. 2004). Optimal habitats for prey may change with  
161 time, as do anti-predator behaviours, thereby forcing the prey to resort to safer micro-habitats.  
162 However, avoidance of ecological risk can become increasingly costly on poor or scarce resources  
163 (Turner 1997), where optimal feeding sites are rare; changes in aphid reproduction may have variable  
164 extended effects on other trophic levels, highlighting the far-reaching effects of fear of predation over  
165 time (Preisser et al. 2005; Creel and Christianson 2008; Steffan and Snyder 2010).

166 It has been well-established that aphids respond to non-consumptive cues associated with their  
167 predators. For example, impaired predators have been shown to negatively impact aphid reproduction  
168 (Nelson and Rosenheim 2006). Encounters between green peach aphid *Myzus persicae* and corpses of  
169 its lacewing predator *Chrysoperla carnea* (Stephens) or plants pre-treated with lacewing cues have  
170 also been reported to induce anti-predator avoidance behaviour and lead to a differential reduction in  
171 aphid fitness as a consequence of fear of predation (Khudr et al. 2017). The literature provides  
172 examples of research on the employment of predator replicas (false predators) (e.g., Mitrovich and  
173 Cotroneo 2006) or artificial prey (e.g., Morrell and Turner 1970; Roslin et al. 2017) to study the  
174 dynamics of predator-prey and risk-prey interactions, but these studies usually focus on higher taxa  
175 rather than insects. As such, mimicking natural enemies by exposing aphids to cued and non-cued  
176 predator simulacra highly resembling the enemies has not been done before. Defining the effects of  
177 these different classes of non-consumptive cues to test whether their mimicry effects can repress aphid  
178 reproduction and induce concomitant anti-predator defences of extreme phenotypic plasticity deserves  
179 careful examination. For that matter, while most research on the ecology of fear focuses on changes in  
180 prey performance, following behaviour modifications, there is an emergent need to decipher  
181 previously uncharted areas of non-consumptive effects of predation risk on prey fitness and pest  
182 control where innovative ecological means are employed (Ingerslew and Finke 2017).

183 In the present work, we investigate the effects of exposure to various types of consumptive and  
184 non-consumptive risks, associated with and/or mimicking an aphidophagous insect *C. septempunctata*  
185 (L.), on the reproductive success (total aphid numbers per census) and extreme phenotypic plasticity  
186 (polyphenism) by counting winged aphid morphs at the end of the experiment. We use one genotype  
187 of a significant crop pest that is green peach aphid *M. persicae* (Sulzer). The rationale of the treatment  
188 setting was mainly built to draw on the developing area of knowledge on aphid responses to  
189 environmental cues and change based on their multi-sensory perception (visual, olfactory, chemical,  
190 tactile, vibrational, and via interoception) (Döring and Chittka 2007; Ninkovic et al. 2013; Barron and  
191 Klein 2016, Klein and Barron 2016, Khudr et al. 2017, Cabej et al. 2019; Tamai and Choh 2019). See  
192 (Fig. 1) for an overview of the conceptual design of the work.

193

194

195

196

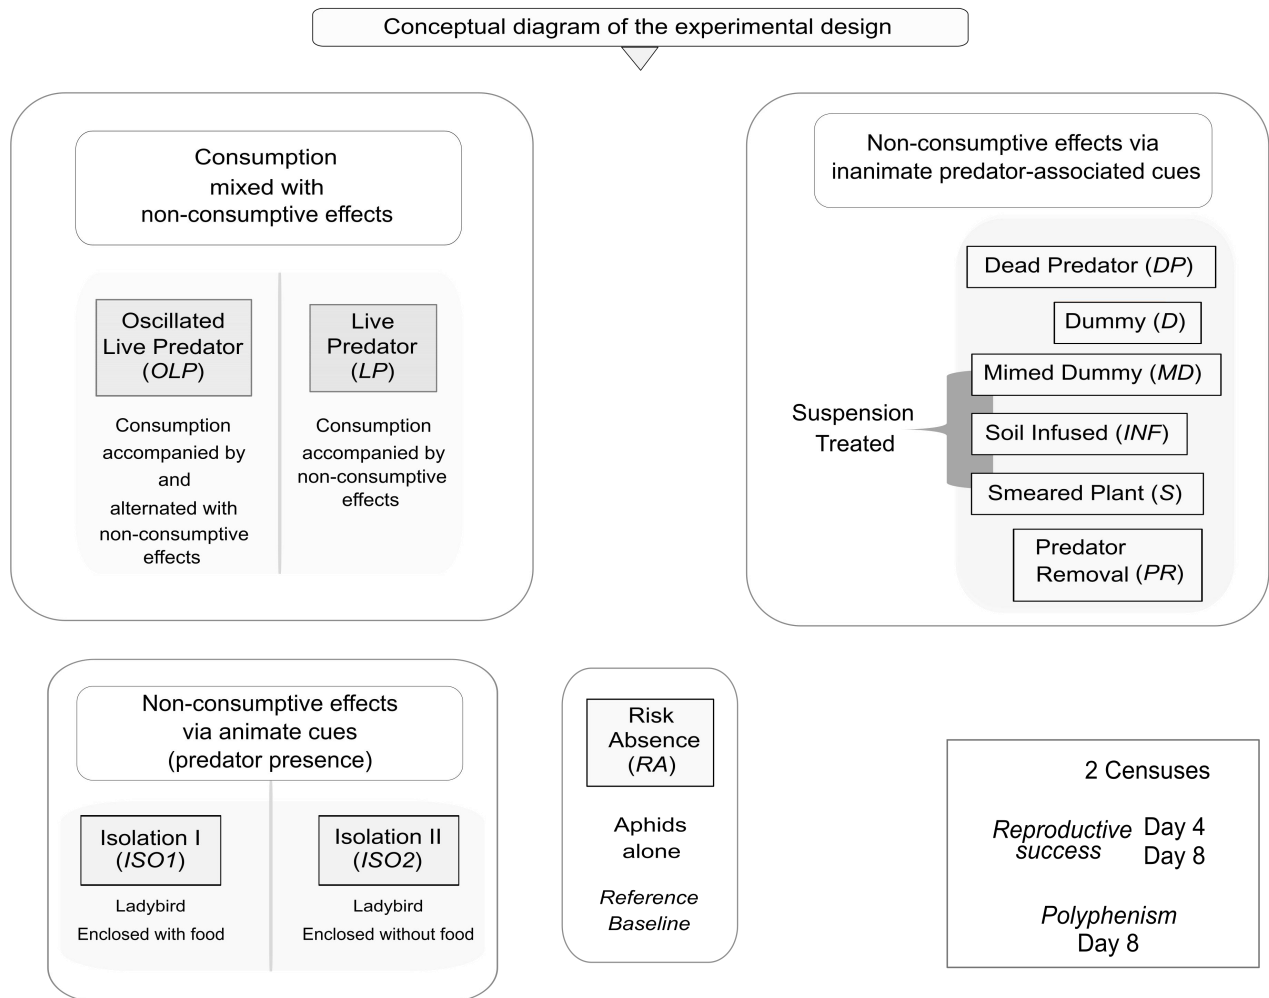

197

198 **Fig. 1. Schematic diagram of the conceptual set-up of the experiment.** The diagram illustrates the  
 199 characteristics of the applied risk treatments associated with ladybird *C. septempunctata* and the  
 200 structure of the analysis of total numbers (as a proxy for reproductive success) on Day 4 and Day 8,  
 201 and winged morphs (alata production denoting distinct phenotypic plasticity [polyphenism]) on Day 8  
 202 of green peach aphid *M. persicae* under the effects of the risk treatments.

203

204 We test the following predictions:

205 1- Dependent on the risk type and its longevity, different types of predator-associated risks are of  
 206 similar magnitude in their repressive capacity of the target clonal aphid population, with consistent  
 207 induced levels of phenotypic plasticity (marking escape tactics).

208 2- Aphid clonal population reacts almost the same to constant and oscillated presence of a predator.



209 3- The impact of an isolated predator, feeding on aphid conspecifics, is tantamount to the impact of the  
210 isolated predator deprived of the feeding.

211 4- Predator dummies would show a similar effect to that of the dead predator on the aphid population  
212 and that might not change when the dummies are enhanced with predator-borne cues.

213

## 214 **Materials and methods**

### 215 **Organisms**

216 This small-scale ecological experiment was performed at the Freie Universität Berlin, Germany,  
217 greenhouse conditions (22-24°C and 16:8 L:D). Savoy cabbage *Brassica oleracea* var. *sabauda*,  
218 cultivar Vertus 2 of stable agronomic performance, purchased from (Sperli©, Germany), was the  
219 treatment host plant. Two seeds were sown on opposite sides of plastic potware (11cm height and  
220 diameter) filled with steam-sterilised soil. All the treatment plants were 30 days old on Day 0 of the  
221 experiment and watered as needed.

222 To control for aphid preconditioning, one clonal lineage of *M. persicae*, initially supplied by  
223 Julius Kühn-Institut (JKI), Berlin, was reared for several generations on kale *Brassica oleracea* var.  
224 Sabellica (L.), cultivar ‘Lerchenzunge’, seeds purchased from (Quedlinburger Saatgut© through a  
225 local supplier, Berlin, Germany), and maintained under the above-mentioned conditions prior to the  
226 commencement of the experiment. Culture and treatment plants are both attractive for *M. persicae*; an  
227 important polyphagous pest (Blackman and Eastop 2007). A population of adults (females) of *C.*  
228 *septempunctata* (seven-spotted ladybird) was obtained from a commercial supplier (Katz Biotech AG,  
229 Baruth, Germany) to control for the sex, age, and background variability of the predator. After receipt,  
230 ladybirds were kept in the fridge (9°C), for one night, in plastic containers that included paper strips.  
231 Before trials, the refrigerated ladybirds were fed individually with 5 nymphs of *M. persicae* from the  
232 stock culture. Additionally, 30 ladybirds (~1,067g in total) were frozen for 48h and utilised afterwards  
233 to prepare predator suspension (described below). The freezing of ladybirds occurred once delivered  
234 from the supplier, with no food provided before freezing.

235

### 236 **The setting**

237 The microcosm (enclosure) of the experiment was made by installing a grid to hold up an ultra-  
238 fine mesh fitted with a zip that was used to enclose each plant pair with their pot. Twenty apterous  
239 third-instar clonal female nymphs of *M. persicae* were placed per microcosm, midway of the two  
240 plants per microcosm. The aphids were carefully transmitted, into each microcosm, on a rectangle of



241 waxed paper (2x1cm), using a fine wet brush. The assay was run for 8 days, starting with Day 0 as the  
242 set-up day. Aphids were counted halfway (Day 4, 1<sup>st</sup> census) and on the last day of the experiment  
243 (Day 8, 2<sup>nd</sup> census) to determine treatment effects on the total raw numbers of *M. persicae*; the leaf  
244 morphology and the seedling architecture of savoy cabbage, the sedentary nature of aphids, and the  
245 controllable detachable enclosure of the microcosm all facilitated a careful aphid count on Day 4 with  
246 the least perturbation possible. On the final count on Day 8, alata production (i.e., the number of alates  
247 [winged morphs indicating polyphenism as discrete of phenotypic plasticity]) was also surveyed per  
248 microcosm. There were 11 simultaneous treatments  $\times$  7 repeats (microcosms) per treatment  $\times$  20 aphid  
249 instars per microcosm totalling up to 1540 genetically identical aphids. The treatments were as follows:  
250 1- *Risk Absence (RA)*: Aphids were alone in the microcosm, risk-free.

251 For treatments (2-5), ladybirds were singly introduced into the microcosms following 1h tune-  
252 up off the fridge at 24°C in individual petri dishes in order to ensure an unfazed transition into the  
253 ambiance of the experiment.

254 2- *Live Predator (LP)*: Once aphids were transferred into respective microcosms, one ladybird was  
255 introduced per microcosm and remained enclosed for the full experiment time where it was left free  
256 to forage the microcosm. For aphid counting on Day 4, ladybirds were captured momentarily in  
257 separate plastic containers. After aphid census, each ladybird was relocated into its corresponding  
258 microcosm. The risk effect here was mainly consumption, but also the predator roaming the  
259 microcosm could generate a non-consumptive effect by their bio-signature cues (e.g.,  
260 semiochemicals, tracks and excretion).

261 3- *Oscillated Live Predator (OLP)*: The predator was left in the microcosm for 2 days followed by one  
262 day ‘out of microcosm’ and so forth periodically until the end of the experiment. We kept the  
263 ladybirds in the fridge (9°C), during the ‘time-out’, in separate glass containers covered with mesh  
264 and one provision of 5 stock of *M. persicae* nymphs as a feed. Containers were numbered and every  
265 ladybird was returned to its original corresponding microcosm after 1 h transitional period in  
266 individual petri dishes at 24°C. For the count on Day 4, ladybirds were captured momentarily in  
267 separate plastic containers. The risk effect here entailed phases of (ladybird in microcosm)  
268 including periodic consumption accompanied by possible non-consumptive effect due to  
269 microcosm-roaming by the predator, which was alternated with intimidation phases (intervals of  
270 ladybird out of microcosm) by inanimate ladybird-borne cues (e.g., semiochemicals, tracks and  
271 excretion) left within the environment of the aphid clone in the microcosm. This presence/absence  
272 rhythm of predation/predation risk served the purpose of creating short-term intervals of  
273 fluctuation/oscillation in risk exposure.

274 Treatments (4-11) all exclude direct prey consumption, and focus on prey intimidation  
275 resulting from the influence of different *animate* or *inanimate* cues associated with non-consumptive  
276 effects of the coccinellid predator; in these treatments the cues were attached to one plant only of the  
277 two available in the microcosm, referred to as the ‘cue-treated plant’.

278 4- *Isolation I (ISO1)*: Each ladybird was enveloped with 20 aphids to feed on, in a fine-mesh sachet  
279 (3x3cm). The mesh was firmly sealed with a rubber band and tied to the stem of one plant in the  
280 microcosm using a string (3cm above soil surface). Instantaneously, aphids were transferred into the  
281 microcosm. Ladybird individuals were left enveloped continuously throughout the treatment. The  
282 risk effect here was prey intimidation (non-consumptive) via the constant presence of an isolated  
283 animate predator, emitting semiochemicals, including olfactory cues, underlain by concurrent  
284 diffusion of alarm pheromone by the consumable conspecific aphids confined also in the predator  
285 sachet.

286 5- *Isolation II (ISO2)*: Ladybirds were individually enveloped, as mentioned above in *ISO1*, but  
287 without the aphid feed. On Day 4, during aphid census, the ladybirds were captured briefly and fed  
288 with 5 aphids from the stock culture in separated plastic containers before they were re-enveloped  
289 in the corresponding sachets. The risk effect here was non-consumptive via the *mere* presence of an  
290 animate predator emitting semiochemicals, including olfactory cues, (without consumption of prey  
291 conspecifics in the predator sachet).

292 6- *Dead Predator (DP)*: Fourteen ladybirds were frozen. Then, two randomly selected ones were  
293 transferred into each microcosm; one ladybird was placed on the ground close to the stem, while the  
294 other was carefully tied to the plant stem (3cm above soil surface), using a sewing kit. The risk  
295 effect here was non-consumptive by inanimate predator-borne cues (visual and olfactory/chemical).  
296 This treatment draws on our recent work on the effects of predator cadavers on aphid population  
297 growth (Khudr et al. 2017).

298 7- *Dummy (D)*: Mock ladybird simulacra were prepared using shaped masses of odourless synthetic  
299 paste and colour markers; visually mimicking *C. septempunctata*. The dummies were waterproofed  
300 beforehand, using a transparent polish. The first dummy was placed on the soil surface, close to the  
301 stem. The second was tied to the plant stem (as in the treatment *Dead Predator*). A string was  
302 attached to the dummy’s end to tether it to the stem, (Fig. 2). The risk effect here was non-  
303 consumptive by inanimate cues (visual mimicry).

304  
305  
306  
307  
308  
309  
310  
311  
312  
313  
314

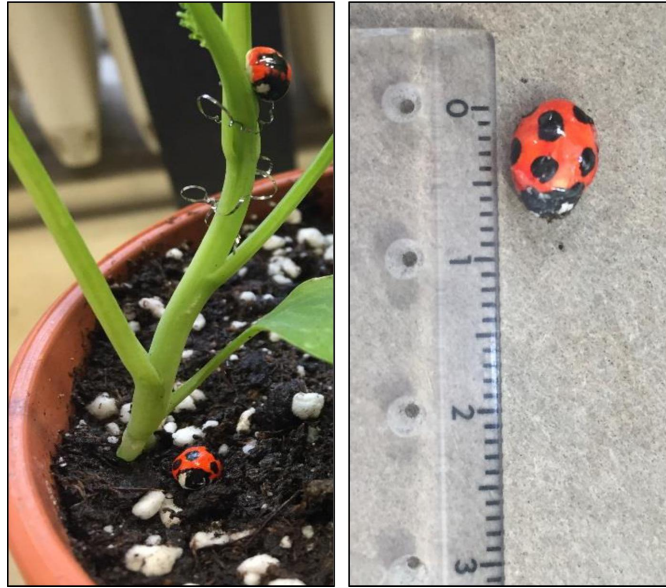

315 **Fig. 2. Predator dummy.** The composite photograph displays the replica or simulacrum of ladybird *C.*  
316 *septempunctata* (termed as ‘dummy’). The same dummy was cued with the ladybird suspension,  
317 conveying predator-borne chemical cues, as described in the main text to create the decoy termed  
318 ‘mimed dummy’. The left part represents the set-up of the dummy or the mimed dummy, while the  
319 part on the right represents an exemplary dummy with reference in cm.

320

321 For the treatments (8-10), the above-mentioned predator suspension was prepared by fine-  
322 crushing 30 frozen ladybirds, using a grinding glass kit. Water was added up to a volume of 150ml.  
323 The suspension was vigorously shaken before each application.

324 *8- Mimed Dummy (MD)*: Dummies were bound to one plant in the microcosm as described in the  
325 *Dummy* treatment above. Then, they were carefully smudged several times with the suspension  
326 prior to the introduction of aphids into microcosms. The risk effect here was non-consumptive by  
327 inanimate mimicry of the predator as the *MD* in this manner potentially provided aphids with two  
328 types of information: visual cues of the predator dummy and olfactory or chemical stimuli due to  
329 the added predator-borne cues to the surface of the dummy.

330 *9- Smearred Plant (S)*: The leaves and stem of one plant in each corresponding microcosm were  
331 generously daubed with the suspension prior to the introduction of aphids. The risk effect here was  
332 non-consumptive by inanimate predator-borne info-chemicals.

333 *10- Soil Infused (INF)*: A syringe with a modified elongated nozzle was inserted into the soil to  
334 gradually inject the aforementioned suspension at varying depths in contact with the roots of one  
335 plant of the two available in the microcosm. The infusion process of 10 mini-shots (1.9 ml per shot)  
336 covered the root system up to the disc where the stem came forth; 19 ml suspension was used in  
337 total per microcosm. This created a fine potential ‘prey intimidation zone’ in and on the soil  
338 surrounding the root system and the stem base of the treated plant. The risk effect was non-  
339 consumptive after the soil-infusion with predator-borne info-chemicals, drawing on our recent work  
340 on the applied infusion method for soil manipulation to directly or indirectly impede pest  
341 population growth (Khudr et al. 2017).

342 *11- Predator Removal (PR)*: Ladybirds were taken off the fridge for 1h to tune-up and fed with 5  
343 nymphs of *M. persicae* from the stock population. For 48 h, one ladybird was left with one plant  
344 only per microcosm for each repeat of this treatment in order to have the plants marked by the bio-  
345 signature of the ladybird. Subsequently, after the removal of the predator, a fresh plant (untreated  
346 and of the same age) was carefully transferred into each microcosm, with a mass of soil surrounding  
347 the roots. This was followed by the introduction of aphids. The risk effect here was non-  
348 consumptive by inanimate predator-borne cues (e.g., semiochemicals, tracks, excretions).

349 See (Fig. 1) for a schematic conceptual diagram of the factors/cues underlying the predator-  
350 associated risks, and (Supplementary Table S1) for further details.

### 351 Statistical analysis

352 We used R version R 3.3.1 (R Core Team 2016). First, to examine the repressive effect of each  
353 predator-associated risk treatment on aphid total numbers per plant in the microcosm (a proxy for  
354 reproductive success) with two counts on Day 4 and Day 8, we applied a generalised linear mixed  
355 effect model (GLMM), with the function ‘glmer’, ‘bobyqa’ optimisation, and gamma family (due to  
356 the non-normal shape of distribution [positive skewness], and as confirmed by Shapiro test), using R  
357 package ‘lme4’ (Bates et al. 2015). The microcosm was nested within the count day times and  
358 randomised in the model; the main effects of the models were respectively revealed using an Anova  
359 command, R packages ‘car’ (Fox and Weisberg 2011). The predator-associated risk treatment  
360 comprised 11 levels (fixed effects) as specified above; the treatment “Risk Absence (*RA*)” made the  
361 model baseline. This was followed by a posthoc pair-wise multiple comparison test (Tukey’s HSD), R  
362 package ‘lsmeans’ (Lenth 2016).

363 Second, we investigated the effects of the aforementioned predator-associated risk treatments  
364 on alata production as alates were counted on Day 8 at the end of the experiment. We applied a  
365 generalised linear model (GLM) with a quasipoisson family (due to over-dispersion and non-normality  
366 [confirmed by Shapiro test]), using R package ‘multcomp’ (Hothorn et al. 2008). The effects were: 1)  
367 The 11-level risk treatment, where “Risk Absence (*RA*)” was the model baseline, 2) Aphid total  
368 numbers per microcosm (aphid density) as a covariate, and 3) the interaction between these effects.  
369 The main effects of the models were revealed using an Anova command, R packages ‘car’. See (Fig. 1)  
370 and (Supplementary Table S1) for conceptual and tabular schemas of the design. Data for this study  
371 are available at the figshare repository via the following URL:  
372 <https://figshare.com/s/b99e89b8a3c6160ab74f>

373

## 374 **Results**

### 375 *Aphid reproductive success*

376 As shown in (Fig. 3), aphids suffered a clear loss in reproductive success that was contextual  
377 and contingent upon the treatment ( $\chi^2_{(10,262)} = 69.07$ ,  $P < 0.0001$ ), underlain by the corresponding  
378 imposed predator-associated risks namely: constant mixed consumptive and possible non-consumptive  
379 risks (*LP*) ( $P < 0.0001$ ), oscillated consumptive risk with intervals of exposure to non-consumptive risk  
380 associated with predator-borne cues (*OLP*) ( $P < 0.0001$ ), non-consumptive animated risk associated  
381 with an isolated predator enclosed with an aphid conspecific feed (*ISO1*) ( $P = 0.019$ ), non-consumptive  
382 animated risk associated with an isolated predator without the aphid feed (*ISO2*) ( $P = 0.011$ ), non-  
383 consumptive risk associated with a predator corpse (*DP*) ( $P = 0.0003$ ), non-consumptive risk  
384 associated with a predator replica (*D*) ( $P = 0.013$ ), non-consumptive risk associated with a predator  
385 replica treated with predator-borne cues (*MD*) ( $P = 0.003$ ), and non-consumptive risk associated with  
386 host plant treated with predator-borne cues (*S*) ( $P = 0.004$ ).

387 The repression of the reproductive success was lower than in the control for all treatments,  
388 albeit being less noticeable under both the non-consumptive risk associated with soil-infused predator-  
389 borne cues in (*INF*) and the non-consumptive risk associated with host plant previously exposed to  
390 interaction with a live predator in (*PR*), as the effects of *INF* and *PR* were statistically insignificant  
391 (see Supplementary Tables S2 for model details, and Table S3 for posthoc multiple pairwise  
392 comparisons).

393

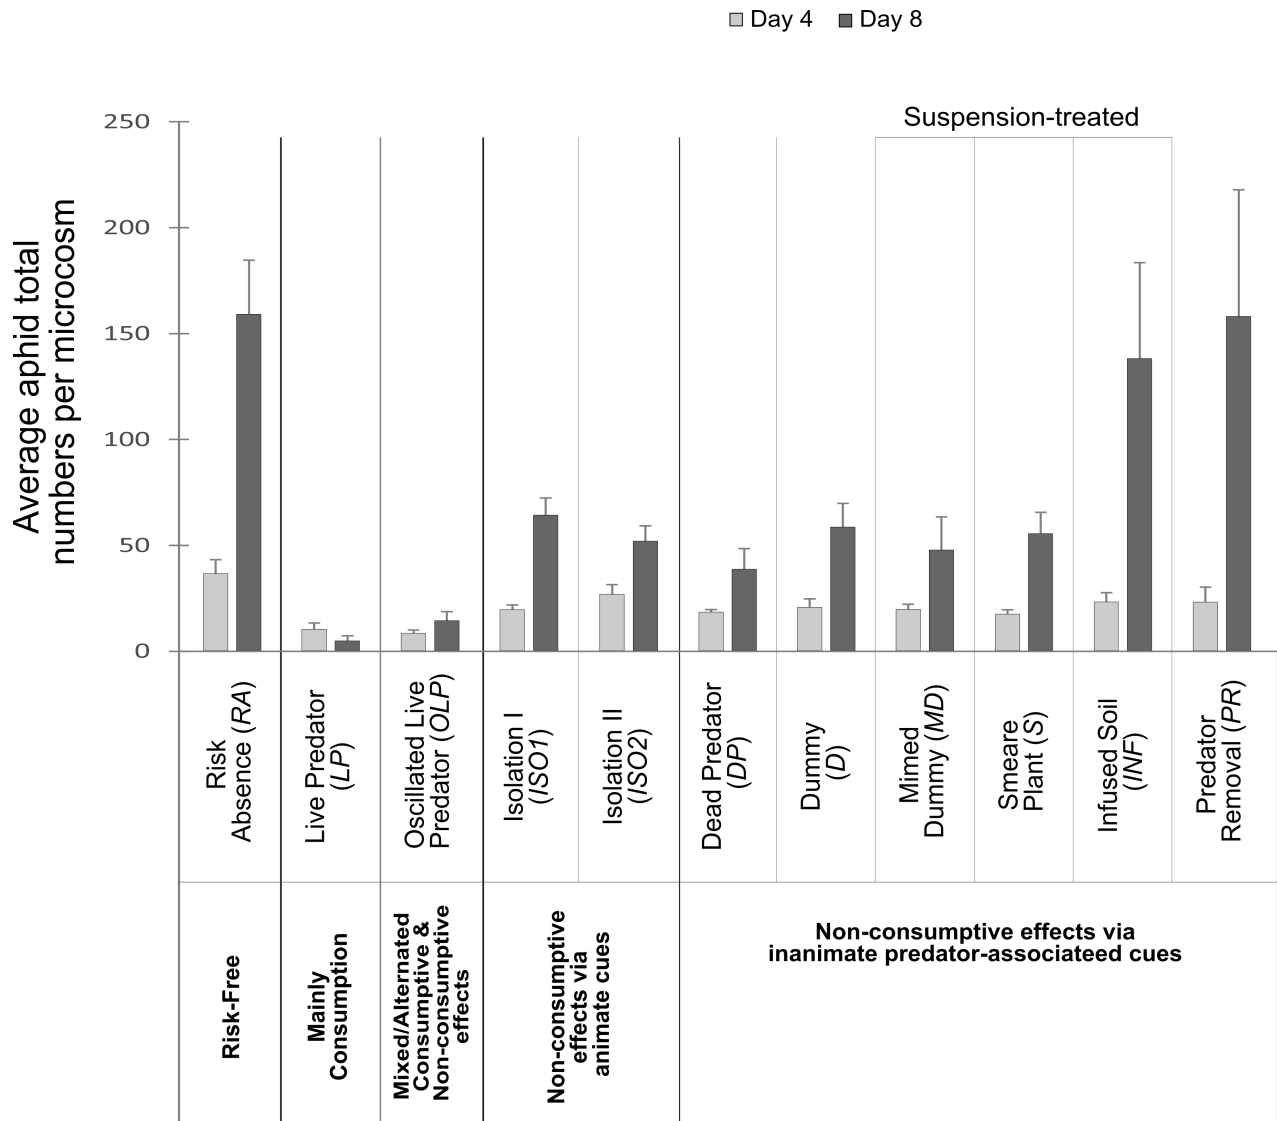

394

395 **Fig. 3. Aphid reproductive success under predator-associated risks.** The chart illustrates the  
 396 average aphid total raw numbers ( $\pm$ SEM) in the microcosm (as a proxy for the reproductive success of  
 397 green peach aphid *M. persicae*) in response to the risk treatments associated with ladybird *C.*  
 398 *septempunctata*. The light grey bar shows the mean reproductive success on Day 4 (1<sup>st</sup> census); the  
 399 darker bar displays the mean reproductive success on Day 8 (2<sup>nd</sup> census).

400

401

402 *LP* ( $\bar{x}$  = 10  $\pm$ 3SEM aphids in the 1<sup>st</sup> census [Day 4], and  $\bar{x}$  = 5  $\pm$ 2SEM aphids in the 2<sup>nd</sup>  
 403 census [Day 8]) and *OLP* ( $\bar{x}$  = 8  $\pm$ 3SEM aphids in the 1<sup>st</sup> census, and  $\bar{x}$  = 14  $\pm$ 4SEM aphids in  
 404 the 2<sup>nd</sup> census) had alternately together the strongest negative impacts on aphid numbers throughout  
 405 the experiment, (Table 1, Fig. 3). The least effective treatment on Day 4, ranking 10<sup>th</sup> in impeding



406 aphid reproductive success, was (*ISO2*) ( $\bar{x} = 26.57 \pm 4.59\text{SEM}$  aphids) compared to the control (*RA*)  
407 ( $\bar{x} = 36 \pm 6.65\text{SEM}$  aphids). The least impeding one on Day 8 was (*PR*) with a very poor decrement  
408 of aphid reproductive success ( $\bar{x} = 158 \pm 60\text{SEM}$  aphids). The treatments (*ISO1* on Day 4, and *ISO2*  
409 on Day 8) ranked 5<sup>th</sup> on the impediment scale; whereas, the 3<sup>rd</sup> and 4<sup>th</sup> ranks were always held by (*S*)  
410 and (*DP*) on Day 4, and (*DP*) and (*MD*) on Day 8, as they were more efficient in their impeding effects  
411 than *ISO1* and *ISO2*, (Table 1, Fig. 3). It is noteworthy that (*S*) of the treatments excluding a live  
412 predator had the most negative impact on aphid reproductive success ( $\bar{x} = 17 \pm 2\text{SEM}$  aphids) on  
413 Day 4, that was 52% decrement of reproductive success compared to the observation under the control  
414 (*RA*); nevertheless, (*S*) was only 23% and 20% less effective than (*OLP*) and (*LP*), respectively. At the  
415 bottom of the chart was (*ISO2*) with only 25% reduction of reproductive success in comparison with  
416 the control, (Table 1, Fig. 3).

417 Noticeably, in the 2<sup>nd</sup> census the risks associated with inanimate cues led to nuanced differential  
418 effects of impeding aphid reproductive success: *Dead Predator (DP)*, being the most effective,  
419 resulted in ~ 76% lower reproductive success ( $\bar{x} = 38 \pm 10\text{SEM}$  aphids) than the control ( $\bar{x} =$   
420  $159 \pm 26\text{SEM}$  aphids); (*DP*) was only 21% and 15% less effective than (*LP*) and (*OLP*), respectively.  
421 By contrast, the aphid population thrived by the 2<sup>nd</sup> census and reached a high score after the soil was  
422 cued in (*INF*) ( $\bar{x} = 138 \pm 45\text{SEM}$  aphids) and also under *Predator Removal (PR)* ( $\bar{x} = 158$   
423  $\pm 60\text{SEM}$  aphids), entailing short-lived risk effects. Further, (*DP*) maintained the same rank (7<sup>th</sup>) in  
424 both censuses; likewise (*INF*) kept the 9<sup>th</sup> rank across censuses. Additionally, (*DP*, *S*, and *MD*) were  
425 always within the rank range 3<sup>rd</sup>-6<sup>th</sup>, and (*D*) always maintained the 7<sup>th</sup> rank across censuses (Table 1).

426

427

428

429

430

431

432

433

434

435

436

437



438 **Table 1. Relative impediment of aphid reproductive success by predator-associated risks in**  
 439 **ranks across two censuses.** The different risk treatments are ordered in terms of the decrement of  
 440 aphid numbers in the microcosm (as a proxy for reproductive success of green peach aphid *M.*  
 441 *persicae*) in response to the risk treatments associated with ladybird *C. septempunctata*. Each  
 442 treatment has an impediment rank number above and a percentage beneath that elucidates the  
 443 decrement of the aphid population relative to the risk-free control (Risk absence [*RA*]). For example,  
 444 on Day 8 (1<sup>st</sup> census), aphid reproductive success under (*DP*) was 76% lower than the reproductive  
 445 success under (*RA*), i.e., the reproductive success in (*DP*) was 24% the reproductive success under  
 446 (*RA*). The treatments were: Risk Absence (*RA*), Live Predator (*LP*), Oscillated Live Predator (*OLP*),  
 447 Isolation I (*ISO1*), Isolation II (*ISO2*), Dead Predator (*DP*), Mimed Dummy (*MD*), Dummy (*D*),  
 448 Smeared Plant (*S*), Soil Infused (*INF*), and Predator Removal (*PR*).

| Rank                              | Most efficient<br>① | ②                 | ③                | ④                | ⑤                  | ⑥                | ⑦               | ⑧                  | ⑨                 | Least efficient<br>⑩ | Risk Free<br>⑪                       |
|-----------------------------------|---------------------|-------------------|------------------|------------------|--------------------|------------------|-----------------|--------------------|-------------------|----------------------|--------------------------------------|
| 1 <sup>st</sup> Census<br>(Day 4) | <i>OLP</i><br>77%   | <i>LP</i><br>72%  | <i>S</i><br>52%  | <i>DP</i><br>50% | <i>ISO1</i><br>46% | <i>MD</i><br>44% | <i>D</i><br>42% | <i>PR</i><br>37%   | <i>INF</i><br>36% | <i>ISO2</i><br>25%   | <i>RA</i><br>x-bar = 36<br>±6.65SEM  |
| 2 <sup>nd</sup> Census<br>(Day 8) | <i>LP</i><br>97%    | <i>OLP</i><br>91% | <i>DP</i><br>76% | <i>MD</i><br>70% | <i>ISO2</i><br>67% | <i>S</i><br>65%  | <i>D</i><br>64% | <i>ISO1</i><br>60% | <i>INF</i><br>13% | <i>PR</i><br>1%      | <i>RA</i><br>x-bar = 159<br>±25.6SEM |

449

450

#### 451 *Aphid polyphenism*

452 The proportions of alates were significantly affected by aphid density in the microcosm  
 453 ( $LR\chi^2_{(1,48)} = 6.49$ ,  $P = 0.011$ ); both the predator-associated risk treatment and the interaction between  
 454 the treatment and aphid density had highly significant effects on alata production ( $LR\chi^2_{(10,48)} = 180.34$ ,  
 455  $P < 0.0001$ ) and ( $LR\chi^2_{(10,48)} = 42.32$ ,  $P < 0.0001$ ), respectively (see Supplementary Tables S4 for model  
 456 details). Alate proportions differed across the predator-associated risk treatments. There were no alates  
 457 to report under (*LP*), different from the unexpected percentage under (*OLP*) (x-bar = 2.8% ±2.78SEM).

458 More surprisingly, we found the highest morph proportion ( $\bar{x} = 16.7\% \pm 5.3\text{SEM}$ ) under (*ISO2*)  
459 (fed ladybirds left with no nourishment in the sachet), but (*ISO1*) (ladybirds enveloped with an aphid  
460 feed) resulted in a considerably small percentage of alates ( $\bar{x} = 0.7\% \pm 0.7\text{SEM}$ ), (Fig. 4). The  
461 proportion of alates was ( $\bar{x} = 1.5\% \pm 0.4\text{SEM}$ ) under the control (*RA*), attributable to crowding.

462 Amongst the inanimate risk-cue treatments, alates proportions were the highest in the presence  
463 of the *Mimed Dummies* (*MD*) ( $\bar{x} = 8.4\% \pm 1.3\text{SEM}$ ), followed by the *Smearred Plant* (*S*) ( $\bar{x} =$   
464  $5.8\% \pm 1.3\text{SEM}$ ), both of the suspension-treated group. Conversely, with notable overall aphid  
465 reproductive success, the second smallest proportion of alates across all the risk treatments was  
466 recorded under (*INF*) ( $\bar{x} = 0.04\% \pm 0.04\text{SEM}$ ). Moreover, aphid reproductive success, on Day 8,  
467 was 75% lower under (*DP*) compared to (*PR*), yet counterintuitively, these non-consumptive risk  
468 treatments resulted in almost identical proportions of alates ( $\bar{x} = 1\% \pm 1.02\text{SEM}$ ) and ( $\bar{x} = 0.9\%$   
469  $\pm 0.76\text{SEM}$ ), respectively. Lastly, the risk imposed by the dummy (*D*) did not elicit any production of  
470 alates, (Fig. 4), (see also Supplementary *Note 1* including Tables S5-S7 for a complementary approach  
471 on analysing the effects of the different types of risk associated with the coccinellid predator).

472

473

474

475

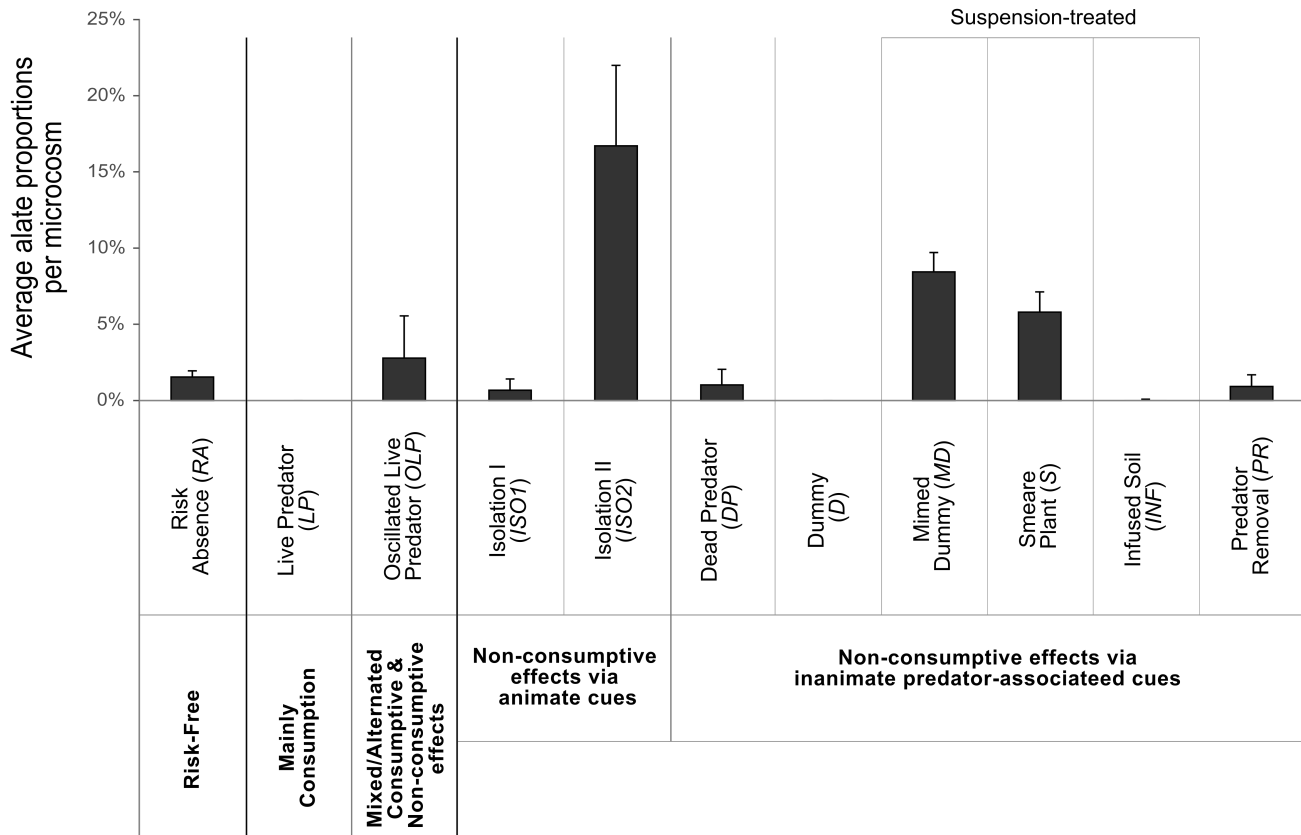

476

477

478 **Fig. 4. Aphid polyphenism under predator-associated risk treatments.** Aphid polyphenism  
 479 (distinct phenotypic plasticity of green peach aphid *M. persicae*) in response to the risk treatments  
 480 associated with ladybird *C. septempunctata* is displayed as the mean percentage of alates (±SEM)  
 481 relative to total aphid numbers in the microcosm on Day 8.

482

## 483 Discussion

484 Using a model agroecosystem of an important parthenogenetic plant pest raised on a significant  
 485 crop, this work addresses repressive effects of fear of predation that have not been previously  
 486 sufficiently investigated in aphid-predator systems. Intimidation by a range of different consumptive  
 487 and/or non-consumptive effects associated with a coccinellid predator resulted in remarkably  
 488 differential and time-limited impedance of the reproductive success of green peach aphid, with  
 489 variable alata production (polyphenism); particularly, novel uses of predator corpses, cued plants, and  
 490 cued predator dummies had strong impacts on the aphid population.

491

492

493 *Reproductive success and polyphenism under risk*

494 Compared to the risk-free treatment (*RA*), *Live Predator (LP)* and *Oscillated Live Predator*  
495 (*OLP*) strongly impeded the reproductive success of *M. persicae*. The diminished aphid population in  
496 (*LP*) was the result of constant consumption mixed with possible non-consumptive effect (prey  
497 intimidation) (Preisser et al. 2005), whilst the predator foraged for food within the microcosm. The  
498 treatment (*OLP*) presented a complex periodic mixed-effect challenge as episodes of consumption  
499 accompanied by non-consumptive effects were interposed by predator time-outs (prey intimidation by  
500 predator-borne cues only) where the predator marks, bearing its semiochemicals, remained on the  
501 plants; different from (*LP*), this idiosyncrasy of variation in (*OLP*) induced more alates. It could be  
502 argued, therefore, that temporal variation and alternation of risk states (consumptive and non-  
503 consumptive) can induce various adaptive prey responses (Weisser, et al. 1999; Kunert and Weisser  
504 2003; Keiser 2012; Keiser and Mondor 2013). Prey may reduce investment in and display of anti-  
505 predator behaviours under episodes of high or prolonged risk exposure (McNamara and Houston 1987;  
506 Lima and Bednekoff 1999; Hamilton and Heithaus 2001; Kotler et al. 2004), whilst the frequency of  
507 risk exposure may influence prey decisions (Lima and Bednekoff 1999) and shape prey propensities  
508 for escape and survival (Mackay and Wellington 1975; Lima and Bednekoff 1999; Keiser and Mondor  
509 2013); the extent of the influence of risk on prey fitness and population dynamics has been proposed to  
510 be dependent on prey physiology as well as on temporal variability of risk (Trussell et al. 2011; Matassa  
511 and Trussell 2014). Our findings suggest that examining prey responses to pulsated variable intensities  
512 of predation risk (Lima and Bednekoff 1999; Trussell et al. 2011) should receive further investigation  
513 in future studies.

514 The non-consumptive effects of the animate risk associated with the isolated ladybird through  
515 its mere presence in the microcosm (*ISO2*) had a significant negative effect on the aphid population.  
516 Although the reproductive success was lower under (*ISO1*) than (*ISO2*) according to the 1<sup>st</sup> census, the  
517 pattern of difference was surprisingly reversed in the 2<sup>nd</sup> census, with more decrement of aphid  
518 numbers under (*ISO2*), with a remarkable ~25-fold (i.e., 96%) increase in alata production. The aphid  
519 feed under (*ISO1*) was consumed alive in the micro-porous sachet poised in the vicinity of the target  
520 aphid clone; by Day 4, the ladybird having consumed the feed in isolation, there were seemingly  
521 plenty of aphid alarm signals diffusing from the sachet hence resulting in (*ISO1*) having a considerable  
522 impact. By contrast, up to the same day, the ladybird in (*ISO2*) was presumably emitting  
523 semiochemicals (Norin 2009) but that was not backed up enough by aphid alarm pheromone to result  
524 in a clear repressive effect. Afterwards, on Day 8, the ladybird in (*ISO2*) became increasingly hungry

525 and might have been, therefore, emitting more intensive bursts of semiochemicals that triggered an  
526 alarm state in the clone and induced the production of alates; whereas, the effects of (*ISO1*) were  
527 noticeably weaker perhaps because there were no conspecifics left to be preyed upon by then and thus  
528 not enough a trigger of the alarm state. But, during the brief feeding period in (*ISO2*), it was also likely  
529 that the ladybird became smeared with cornicle secretions produced by stock aphids (the same clone as  
530 the experimental one); alarm signals might have emanated from the smeared secretions, after the  
531 ladybirds were re-introduced into the experimental units (Mondor and Roitberg 2004; Tamai and Choh  
532 2019), and contributed to the induction of polyphenism and the population diminution via an extra  
533 non-consumptive effect. As such, the difference in aphid reproductive success between those animate  
534 risk treatments might be partly explained by the higher percentages of winged offspring, entailing  
535 reduced fecundity for the advantage of dispersal under (*ISO2*). More investment in dispersal, as an  
536 anti-predator defence, can be read as a transgenerational adaptive tactic (Keiser 2012; Keiser and  
537 Mondor 2013; Cabej 2019), but the inducible defence can be costly in the sense that it implicates a  
538 lower reproductive success due to a decreased production of fecund apterae (Mackay and Wellington  
539 1975; Dixon 1998; Dixon and Agarwala 1999; Ingerslew and Finke 2017); survival of the clone may  
540 increase in the long term because of dispersion (Francke et al. 2008; Keiser 2012). Our findings imply  
541 that the prey-originated and the predator-originated cues might be seemingly intertwined in their  
542 collective effect on the aphid population, as the impact of the non-consumptive effects of the mere  
543 presence of the predator may need coupling with aphid alarm pheromones for the effect of the “scent  
544 of fear” (Leather 2015) to heighten (Ingerslew and Finke 2017); see also (Kats and Dill 1998; Fievet et  
545 al. 2009). Could it be, however, that the longer the isolated predator starves, up to a threshold, the  
546 more effective the release of the alert/alarm cues (eliciting flight defence) in the vicinity of the prey  
547 population?

548 The non-consumptive effects of the animate risk cues were by and large critical in impeding  
549 aphid reproductive success and generally of similar magnitudes to the non-the consumptive effects of  
550 the inanimate ones. Our results support earlier findings on the disruptive or suppressive effects of non-  
551 consumptive predation risk on aphid population dynamics (Nelson and Rosenheim 2006; Nelson 2007)  
552 including the effects of dead conspecifics (Fievet et al. 2008), predator bio-signature (Steffan and  
553 Snyder 2010; Ninkovic et al. 2013), and impaired predators (Nelson et al. 2004; Nelson and  
554 Rosenheim 2006). The population-diminishing effects of the inanimate risk cues pertaining to (*DP*),  
555 (*D*), (*MD*), and (*S*) were largely persistent by the 2<sup>nd</sup> census, suggesting an extended negative impact  
556 on aphid reproductive success against time. In stark contrast, the effects of the soil-infused (*INF*) and

557 the predator removal (*PR*) were short-lived and weakened after Day 4. It should be highlighted that by  
558 the 2<sup>nd</sup> census, the effect of the predator replicas in the *Dummy* treatment (*D*), representing predator  
559 visual mimicry, became augmented in impeding aphid reproductive success after the daubing of the  
560 dummy with the predator suspension bearing olfactory cues in the *Mimed Dummy* treatment (*MD*). Yet  
561 the effect of (*MD*) could not surpass that of the predator corpse in (*DP*) across censuses. Eventually,  
562 (*DP*) had largely a stronger negative influence on the reproductive success than the predator-  
563 mimicking treatments (*Dummy*, *Mimed Dummy*, *Smearred Plant*, and *Soil Infused*) and the animate-risk  
564 treatments (*ISO1*) and (*ISO2*). This possibly pertains to more reliable visual and olfactory plus tactile  
565 cues the predator corpses in (*DP*), followed by the mimed dummies in (*MD*), bore in contact with the  
566 target aphids. The rest of the non-consumptive risk treatments, which mostly entailed either visual or  
567 olfactory signals, were not as effective as the predator corpses and the dummies. This receives  
568 credence from the findings documented by Ingerslew and Finke (2017) on the palpation of aphids by  
569 parasitoid wasps, suggesting an under-studied non-consumptive negative tactile effect on aphid fitness  
570 that might be applicable for other aphidophagous natural enemies. The combination of several aphid  
571 perceptions (Ben-Ari and Inbar 2014) of distinct concurrent risk cues could be the decisive factor  
572 behind the superlative repressive effect of (*DP*) in the long run. Overall, our findings comparatively  
573 showcase that dead predators and *biomimetic* synthetics along with manipulating the non-consumptive  
574 effects of isolated predators may, in novel fashions, lead to tangible pest control results.

575 Not only can polyphenism be induced by aphid density (Dixon 1998), but also by a variety of  
576 other factors spanning residing in exhausted resources and the presence of natural enemies (Dixon  
577 1998; Kunert et al. 2005; Creel and Christianson 2008); previous studies showed that ladybird traces  
578 might, as well, trigger the production of alates (Dixon and Agarwala 1999). Our results indicate that  
579 intimidation signals by the animate risk in (*ISO2*) and the inanimate risks in (*M*) and (*S*) might have  
580 played a critical role in the induction of the winged morphs as a phenotypically plastic response the  
581 risk, irrespective of the smaller corresponding populations suffering from repression pressure of the  
582 ranks 4<sup>th</sup>, 5<sup>th</sup>, and 6<sup>th</sup>, respectively, as per the 2<sup>nd</sup> census. However, Purandare et al. (2014)  
583 demonstrated in a study on transgenerational polyphenism in pea aphid that the tracks of a coccinellid  
584 predator induced the least number of dispersive morphs if compared with the control or the effect of  
585 crowding; the cited authors suggested that these polyphenic responses might be dependent on the  
586 intensity and sufficiency of predation risk cues. Nevertheless, the proportions of winged offspring  
587 continued to differ under the influence of non-consumptive effects in our study. For example, the  
588 treatments (*MD*) and (*S*) led to a greater number of alates while impeding reproductive success. As the

589 dispersive winged phenotype is less fecund than the wingless (Roitberg et al. 1979, Dixon 1998,  
590 Kunert and Weisser 2003), alata production can also account for the reduced aphid densities under risk  
591 in (*MD*) and (*S*) due to increased investment in the generation of alates. In comparison, under (*INF*)  
592 and (*PR*), the aphid population thrived (yet produced negligible to relatively small numbers of alates).  
593 This implies that alarm signals (pheromones) and risk cues (semiochemicals), not crowdedness in  
594 these cases, were decisive in inducing polyphenism as a defence to flee the risk.

595 In other words, our results suggest that the mimics (dummies, mimed dummies, and the cued  
596 plant) might have ‘tricked’ the aphids as the decoys seemed to have been perceived as a real threat that  
597 altered the transgenerational phenotypic plasticities and adaptations (Keiser 2012) of the exposed  
598 aphids. Concomitant modified reproduction plus alata production (Nelson et al. 2004, Nelson 2007;  
599 Khudr et al. 2017) seem to be contextual anti-predator tactics that may change relevant to aphid  
600 physiological state and the state and the nature of risk (McAllister et al. 1990; Mousseau and Fox 1998;  
601 Weisser et al. 1999; Villagra et al. 2002; Hu et al. 2018), the type and frequency of risk exposure (Sih  
602 et al. 2000; Matassa and Trussell 2014). Again, the anti-predator responses involve energetic and  
603 physiological tolls (Creel and Christianson 2008) on the reproduction of the clonal prey population  
604 (Dixon and Agarwala 1999; Nelson et al. 2004; Mondor et al. 2005; Nelson 2007) wherever aphids  
605 encounter predators and predation risk (Nelson et al. 2004; Nelson and Rosenheim 2006; Nelson 2007).  
606 Still, other possible explanations for our results might be partly assignable to mortality as a result of  
607 predator-induced stress, as suggested by McCauley et al. (2011), and/or reproductive costs following  
608 abrupt changes in diet and disruption of feeding time (Nelson 2007). All in all, the induction of  
609 polyphenism by the treatment including mimetic dummies or treated host plants with predator-borne  
610 cues unveiled extreme phenotypic plasticity (Mondor et al. 2005; Whitman and Agrawal 2009) in  
611 green peach aphid as means of escaping novel threats (Grostal and Dicke 1999). We can assume,  
612 therefore, that the influence of fear of predation on aphid fitness might be pronounced in environments  
613 with frequent disturbances and disproportionate intensities of localised environmental risk. This is  
614 concordant with the findings reported by Lin and Pennings (2018) suggesting that aphid control by  
615 ladybirds can be strong on fine spatial scales, as in our study system, where the aphid-ladybird  
616 interactions have been shown to be more prominent (Lin and Pennings 2018).

617 Based on the risk allocation hypothesis (Lima and Bednekoff 1999), we propose that the  
618 variation in responses to the cocktail of non-consumptive effects in our study can be largely attributed  
619 to *M. persicae*'s ability to perceive, identify and respond to different kinds, intensities and frequencies  
620 of environmental risks by relying on combined modalities (Ben-Ari and Inbar 2014). As they assess



621 cues from their embedding contexts, aphids adjust their progenies phenotypes to adapt to change and  
622 procreate (Dixon 1998; Dixon and Agarwala 1999; Keiser 2012; Ben-Ari and Inbar 2014); less  
623 accurate or wrong assessment of risk can lead to subsequent maladaptive or delayed decisions ending  
624 with fitness loss (Mackay and Wellington 1975; Nelson 2007; Keiser 2012), but see (Tamai and Choh  
625 2019). But, it can be argued that the non-consumptive risk treatments in our work presented variably  
626 unreliable cues that led to perceiving the embedding contexts by the aphids of the female-only clone as  
627 rather inhospitable; this would have created, in turn, a varying state of sensory ambiguity that altered  
628 prey's decisions and consequently hampered aphid fitness (Koops 2004). For instance, the notable  
629 difference between the impacts of (*PR*) and (*S*) on the aphid population lies in the fact that the intensity  
630 of the predator-borne cues smeared on the plant in (*S*) was up to or above a threshold necessary to  
631 elicit polyphenism as plastic anti-predator defence causing aphid reproductive success to decelerate.  
632 The impact of (*S*) was accentuated anthropogenically by daubing (smearing) unlike the (*PR*) treatment  
633 that just imitated a natural process when a predator marks a plant whilst searching for prey. Further,  
634 the short-lived effects of (*INF*) and (*PR*) conform to the work provided by Koops (2004), suggesting  
635 that the acquisition of ambiguous information may have a shorter temporal influence on prey decision  
636 making than the information acquired from reliable cues. Notwithstanding, the weak effects of the  
637 (*INF*) and (*PR*) in the long run could also be on account of risk habituation; it has been shown that  
638 prey responsiveness to predation risk may decrease due to habituation after continuous exposure to  
639 non-lethal cues (Shalter 1984; Holomuzki and Hatchett 1994).

640 At any rate, we did not observe any clear direct avoidance of the cue-treated plants in the  
641 microcosm by aphids, but the phenotypic plasticity, denoting dispersal, was detectable as described  
642 above (see Supplementary Note 2). Further, *M. persicae* also varied its inducible defences under (*ISO2*)  
643 of prey intimidation by animate risk, as there was less investment in the production of apterae,  
644 increased maternal conditioning of offspring into alates, and relatively more aphids abandoned and/or  
645 dropped off their host plants (see also Supplementary Note 3 including Table S8 and Fig. S1 for a  
646 spotlight on a complementary off-plant behaviour).

647 In summary, amid research scarcity on the effects of indirect and imitative stimuli associated  
648 with aphidophagy, our assay provides empirical evidence of the negative impact of non-consumptive  
649 effects associated with a coccinellid predator on a clonal population of an important aphid species,  
650 stressing the importance of widening the scope of investigation of prey intimidation in predator-prey  
651 systems. Interestingly, the isolated starved predator led to unparalleled intensified induction of  
652 phenotypic plasticity, and the effects of the inanimate cues resulted in better or similar negative

653 impacts on aphid reproductive success when compared to those of the animate risk (i.e., the presence  
654 of an isolated predator). We also found that certain risk effects may have a variable longevity in a  
655 context-dependent fashion; specific types of novel prey intimidation by dead predators and mimed  
656 dummies were persistent in effect and considerably more efficient than others (e.g., soil infusion with  
657 predator-borne cues). Our findings have the potential to provide unorthodox eco-friendly means to  
658 protect agroecosystems from pest irruptions *in situ* and *in natura*.

659

## 660 **Acknowledgements**

661 Special thanks go to Dr Inga Mewis (JKI, Berlin) for providing an initial sample of the *M. persicae*  
662 clone used in this study, and to Dr Reinmar Hager for hosting MSK while finalising the manuscript.  
663 Many thanks to Hayley Craig for the insights and comments on improving the manuscript. This work  
664 received funding from the Freie Universität Berlin for MSK. OYB was funded by the DRS Point  
665 Fellowship, Freie Universität Berlin.

666

667

668

669

670

671

672

673

674

675

676

677

678

679

680

681

682

683

684

685 **References**

- 686 Agabiti, B., Wassenaar, R., and Winder, L. 2016. Dropping behaviour of pea aphid nymphs increases  
687 their development time and reduces their reproductive capacity as adults. *PeerJ* **4**: p.e2236.  
688 <http://dx.doi.org/10.7717/peerj.2236>
- 689 Barron, A., and Klein, C. 2016. What insects can tell us about the origins of consciousness. *PNAS* **113**:  
690 4900–4908. <https://doi.org/10.1073/pnas.1520084113>
- 691 Bates, D., Mächler, M., Bolker, B., and Walker, S. 2015. Fitting linear mixed-effects models using  
692 lme4. *J. Stat. Softw.* **67**: 1–48. <http://dx.doi.org/10.18637/jss.v067.i01>
- 693 Ben-ari, M., and Inbar, M. 2014. Aphids link different sensory modalities to accurately interpret  
694 ambiguous cues. *Behav. Ecol.* **25**: 627–632. <http://dx.doi.org/10.1093/beheco/aru033>
- 695 Blackman, R., and Eastop, V. 2007. *Myzus persicae* (peach potato aphid). In *Aphids as crop pests*.  
696 Edited by H. Van emden and R. Harrington. CAB International, Oxfordshire, Cambridge. pp.  
697 15–16.
- 698 Cabej, N. 2019. *Epigenetic principles of evolution*. Academic Press, Elsevier Inc.
- 699 Coslovsky, M., and Richner, H. 2011. Predation risk affects offspring growth via maternal effects.  
700 *Funct. Ecol.* **25**: 878–888. <http://dx.doi.org/10.1111/j.1365-2435.2011.01834.x>
- 701 Creel, S., and Christianson, D. 2008. Relationships between direct predation and risk effects. *Trends*  
702 *Ecol. Evol.* **23**: 194–201. <http://dx.doi.org/10.1016/j.tree.2007.12.004>
- 703 de vos, M., Cheng, W., Summers, H., Raguso, R., and Jander, G. 2010. Alarm pheromone habituation  
704 in *Myzus persicae* has fitness consequences and causes extensive gene expression changes.  
705 *PNAS* **107**: 14673–14678. <http://dx.doi.org/10.1073/pnas.1001539107>
- 706 Dixon, A. 1998. *Aphid ecology: An optimization approach*. 2<sup>nd</sup> ed. Chapman and Hall, London.
- 707 Dixon, A., and Agarwala, B. 1999. Ladybird-induced life-history changes in aphids. *Proc. Royal Soc.*  
708 *B.* **266**: 1549–1553. <http://dx.doi.org/10.1098/rspb.1999.0814>
- 709 Döring, T., and Chittka, L. 2007. Visual ecology of aphids—a critical review on the role of colours in  
710 host finding. *Arthropod Plant Interact.* **1**: 3–16. <https://doi.org/10.1007/s11829-006-9000-1>
- 711 Evans, D., and Schmidt, J. 1990. *Insect defenses: Adaptive mechanisms and strategies of prey and*  
712 *predators*. State University of New York Press, Albany.
- 713 Ferrari, M., Wisenden, B., and Chivers, D. 2010. Chemical ecology of predator–prey interactions in  
714 aquatic ecosystems: A review and prospectus. *Can. J. Zool.* **88**: 698–724.  
715 <http://dx.doi.org/10.1139/Z10-029>

- 716 Fievet, V., Le Guigo, P., Casquet, J., Poinsot, D., and Outreman, Y. 2009. Living with the dead: When  
717 the body count rises, prey stick around. *Behav. Ecol.* **20**: 251–257.  
718 <http://dx.doi.org/10.1093/beheco/arp014>
- 719 Fievet, V., Lhomme, P., and Outreman, Y. 2008. Predation risk cues associated with killed  
720 conspecifics affect the behavior and reproduction of prey animals. *Oikos* **117**: 1380–1385.  
721 <http://dx.doi.org/10.1111/j.0030-1299.2008.16629.x>
- 722 Fox, J., and Weisberg, S. 2011. *An R companion to applied regression*. 2<sup>nd</sup> ed. Sage, Thousand Oaks  
723 CA. (<http://socserv.socsci.mcmaster.ca/jfox/Books/Companion>)
- 724 Francke, D., Harmon, J., Harvey, C., and Ives, A. 2008. Pea aphid dropping behavior diminishes  
725 foraging efficiency of a predatory ladybeetle. *Entomol. Exp. Appl.* **127**: 118–124.  
726 <http://dx.doi.org/10.1111/j.1570-7458.2008.00678.x>
- 727 Grostal, P., and Dicke, M. 1999. Direct and indirect cues of predation risk influence behavior and  
728 reproduction of prey: a case for acarine interactions. *Behav. Ecol.* **10**: 422–427.  
729 <https://doi.org/10.1093/beheco/10.4.422>
- 730 Hamilton, I., and Heithaus, M. 2001. The effects of temporal variation in predation risk on anti-  
731 predator behaviour: an empirical test using marine snails. *Proc. Royal Soc. B.* **268**: 2585–2588.  
732 <https://doi.org/10.1098/rspb.2001.1857>
- 733 Hatano, E., Kunert, G., and Weisser, W. 2010. Aphid wing induction and ecological costs of alarm  
734 pheromone emission under field conditions. *PLoS One* **5**: e11188.  
735 <http://dx.doi.org/10.1371/journal.pone.0011188>
- 736 Hermann, S., and Landis, D. 2017. Scaling up our understanding of non-consumptive effects in insect  
737 systems. *Curr. Opin. Insect Sci.* **20**: 54–60. <http://dx.doi.org/10.1016/j.cois.2017.03.010>
- 738 Hoki, E., Losey, J., and Ugine, T. 2014. Comparing the consumptive and non-consumptive effects of a  
739 native and introduced lady beetle on pea aphids (*Acyrtosiphon pisum*). *Biol. Control* **70**: 78–  
740 84. <http://dx.doi.org/10.1016/j.biocontrol.2013.12.007>
- 741 Holomuzki, J., and Hatchett, L. 1994. Predator avoidance costs and habituation to fish chemicals by a  
742 stream isopod. *Freshw. Biol.* **32**: 585–592.  
743 <http://dx.doi.org/10.1111/j.1365-2427.1994.tb01149.x>
- 744 Hothorn, T., Bretz, F., and Westfall, P. 2008. Simultaneous inference in general parametric models.  
745 *Biom. J.* **50**: 346–363. <http://dx.doi.org/10.1002/bimj.200810425>
- 746 Hu, X., Zhang, Z., Zhu, T., et al. 2018. Maternal effects of the English grain aphids feeding on the  
747 wheat varieties with different resistance traits. *Sci. Rep.* **8**.  
748 <http://dx.doi.org/10.1038/s41598018-25136-x>

- 749 Ingerslew, K., and Finke, D. 2017. Mechanisms underlying the nonconsumptive effects of parasitoid  
750 wasps on aphids. *Environ. Entomol.* **46**: 75–83. <http://dx.doi.org/0.1093/ee/nvw151>
- 751 Kats, L., and Dill, L. 1998. The scent of death: Chemosensory assessment of predation risk by prey  
752 animals. *Écoscience* **5**: 361–394. <http://dx.doi.org/10.1080/11956860.1998.11682468>
- 753 Keiser, C. 2012. Predation risk and colony structure in the pea aphid, *Acyrtosiphon pisum*.  
754 M.Sc. thesis, Department of Biology, Georgia Southern University, USA. Available at:  
755 <https://digitalcommons.georgiasouthern.edu/etd/23>
- 756 Keiser, C., and Mondor, E. 2013. Transgenerational behavioral plasticity in a parthenogenetic insect in  
757 response to increased predation risk. *J. Insect Behav.* **26**: 603–613.  
758 <http://dx.doi.org/10.1007/s10905-013-9376-6>
- 759 Kersch-becker, M., and Thaler, J. 2015. Plant resistance reduces the strength of consumptive and non-  
760 consumptive effects of predators on aphids. *J. Anim. Ecol.* **84**: 1222–1232.  
761 <http://dx.doi.org/10.1111/1365-2656.12371>
- 762 Khudr, MS., Buzhdygan, O., Petermann, J., and Wurst, S. 2017. Fear of predation alters clone-specific  
763 performance in phloem-feeding prey. *Sci. Rep.* **7**: 7695.  
764 <http://dx.doi.org/10.1038/s41598-017-07723-6>
- 765 Kindlmann, P., and Dixon, A. 1989. Developmental constraints in the evolution of reproductive  
766 strategies: telescoping of generations in parthenogenetic aphids. *Funct. Ecol.* **3**: 531.  
767 <http://dx.doi.org/10.2307/2389567>
- 768 Klein, C., and Barron, A. 2016. Insects have the capacity for subjective experience. *Animal Sentience*  
769 **100**: 1–53. Available at:  
770 <https://animalstudiesrepository.org/cgi/viewcontent.cgi?article=1113&context=animsent>
- 771 Koops, M. 2004. Reliability and the value of information. *Anim. Behav.* **67**: 103–111.  
772 <http://dx.doi.org/10.1016/j.anbehav.2003.02.008>
- 773 Kotler, B., Brown, J., and Bouskila, A. 2004. Apprehension and time allocation in gerbils: The effects  
774 of predatory risk and energetic state. *Ecology* **85**: 917–922. <http://dx.doi.org/10.1890/03-3002>
- 775 Kunert, G., and Weisser, W. 2003. The interplay between density-and trait-mediated effects in  
776 predator-prey interactions: a case study in aphid wing polymorphism. *Oecologia* **135**: 304–  
777 312. <http://dx.doi.org/10.1007/s00442-003-1185-8>
- 778 Kunert, G., Otto, S., Röse, U., Gershenson, J., and Weisser, W. 2005. Alarm pheromone mediates  
779 production of winged dispersal morphs in aphids. *Ecol. Lett.* **8**: 596–603.  
780 <http://dx.doi.org/10.1111/j.1461-0248.2005.00754.x1994.tb01149.x>

- 781 Leather, S. 2015. The Scent of Fear – the aphid alarm pheromone. [online] Don't Forget the  
782 Roundabouts. Available at:  
783 <https://simonleather.wordpress.com/2015/01/26/the-scent-of-fear-the-aphid-alarm-pheromone/>
- 784 Lenth, R. 2016. Least-Squares means: The R package lsmeans. *J. Stat. Softw.* **69**: 1–33.  
785 <http://dx.doi.org/10.18637/jss.v069.i01>
- 786 Lima, S. 1998. Nonlethal effects in the ecology of predator-prey interactions. *BioScience* **48**: 25–34.  
787 <http://dx.doi.org/10.2307/1313225>
- 788 Lima, S., and Bednekoff, P. 1999. Temporal variation in danger drives antipredator behavior: The  
789 predation risk allocation hypothesis. *Am. Nat.* **153**: 649–659.  
790 <http://dx.doi.org/10.1086/303202>
- 791 Lima, S., and Dill, L. 1990. Behavioral decisions made under the risk of predation: A review and  
792 prospectus. *Can. J. Zool.* **68**: 619–640. <http://dx.doi.org/10.1139/z90-092>
- 793 Lima, S., and Steury, T. 2005. Perception of predation risk: The foundation of nonlethal predator-prey  
794 interactions *In Ecology of predator-prey interactions*. Edited by P. Barbosa and I. Castellanos.  
795 Oxford University Press, New York. pp. 166-188.
- 796 Lin, W., and Pennings, S. 2018. Predator-prey interactions in a ladybeetle-aphid system depend on  
797 spatial scale. *Ecol. Evol.* **8**: 6537–6546. <https://doi.org/10.1002/ece3.4117>
- 798 Mackay, P., and Wellington, W. 1975. A comparison of the reproductive patterns of apterous and alate  
799 virginoparous *Acyrtosiphon pisum* (Homoptera: Aphididae). *Can. Entomol.* **107**: 1161–1166.  
800 <http://dx.doi.org/10.4039/Ent1071161-11>
- 801 Matassa, C., and Trussell, G. 2014. Prey state shapes the effects of temporal variation in predation risk.  
802 *Proc. Royal Soc. B.* **281**: 20141952. <http://dx.doi.org/10.1890/10-2222.1>
- 803 Mcallister, M., Roitberg, B., and Weldon, K. 1990. Adaptive suicide in pea aphids: Decisions are cost  
804 sensitive. *Anim. Behav.* **40**: 167–175. [http://dx.doi.org/10.1016/S0003-3472\(05\)80676-1](http://dx.doi.org/10.1016/S0003-3472(05)80676-1)
- 805 Mccauley, S., Rowe, L., and Fortin, M-J. 2011. The deadly effects of “nonlethal” predators. *Ecology*  
806 **92**: 2043–2048. <http://dx.doi.org/10.1890/11-0455.1>
- 807 Mcnamara, J., and Houston, A. 1987. Starvation and predation as factors limiting population size.  
808 *Ecology* **68**: 1515–1519. <http://dx.doi.org/10.2307/1939235>
- 809 Mitrovich, M., and Cotroneo, R. 2006. Use of plasticine replica snakes to elicit antipredator behavior  
810 in the California ground squirrel (*Spermophilus beecheyi*). *Southwest Nat.* **51**: 263–267.  
811 [http://dx.doi.org/10.1894/0038-4909\(2006\)51\[263:UOPRST\]2.0.CO;2](http://dx.doi.org/10.1894/0038-4909(2006)51[263:UOPRST]2.0.CO;2)
- 812 Mondor, E., and Roitberg, B. 2004. Inclusive fitness benefits of scent-marking predators. *Proc. Royal*  
813 *Soc. B.* **271**: S341–S343. <http://dx.doi.org/10.1098/rsbl.2004.0179>



- 814 Mondor, E., Rosenheim, J., and Addicott, J. 2005. Predator-induced transgenerational phenotypic  
815 plasticity in the cotton aphid. *Oecologia* **142**: 104–108.  
816 <http://dx.doi.org/10.1007/s00442-004-1710-4>
- 817 Morrell, G., and Turner, J. 1970. Experiments on mimicry: I. the response of wild birds to artificial  
818 prey. *Behaviour* **36**: 116–130. <http://dx.doi.org/10.1163/156853970x00079>
- 819 Mousseau, T., and Fox, W. 1998. The adaptive significance of maternal effects. *Trends Ecol. Evol.*  
820 **13**: 403–407. [http://dx.doi.org/10.1016/S0169-5347\(98\)01472-4](http://dx.doi.org/10.1016/S0169-5347(98)01472-4)
- 821 Nelson, E. 2007. Predator avoidance behavior in the pea aphid: Costs, frequency, and population  
822 consequences. *Oecologia* **151**: 22–32. <http://dx.doi.org/10.1007/s00442-006-0573-2>
- 823 Nelson, E., and Rosenheim, J. 2006. Encounters between aphids and their predators: The relative  
824 frequencies of disturbance and consumption. *Entomol. Exp. Appl.* **118**: 211–219.  
825 <http://dx.doi.org/10.1111/j.1570-7458.2006.00378.x>
- 826 Nelson, E., Matthews, C., and Rosenheim, J. 2004. Predators reduce prey population growth by  
827 inducing changes in prey behavior. *Ecology* **85**: 1853–1858. <http://dx.doi.org/10.1890/03-3109>
- 828 Ninkovic, V., Feng, Y., Olsson, U., Pettersson, J. 2013. Ladybird footprints induce aphid avoidance  
829 behavior. *Biol. Control* **65**: 63–71. <http://dx.doi.org/10.1016/j.biocontrol.2012.07.003>
- 830 Norin, T. 2009. Semiochemicals for insect pest management. *Pure Appl. Chem.* **79**: 2129–2136.  
831 <http://dx.doi.org/10.1351/pac200779122129>
- 832 Podjasek, J., Bosnjak, L., Brooker, D., Mondor, E. 2005. Alarm pheromone induces a  
833 transgenerational wing polyphenism in the pea aphid, *Acyrtosiphon pisum*. *Can. J. Zool.* **83**:  
834 1138–1141. <http://dx.doi.org/10.1139/z05-108>
- 835 Preisser, E., and Bolnick, D. 2008. The many faces of fear: Comparing the pathways and impacts of  
836 nonconsumptive predator effects on prey populations. *PLoS One* **3**: p.e2465.  
837 <http://dx.doi.org/10.1371/journal.pone.0002465>
- 838 Preisser, E., Bolnick, D., and Benard, M. 2005. Scared to death? The effects of intimidation and  
839 consumption in predator-prey interactions. *Ecology* **86**: 501–509.  
840 <http://dx.doi.org/10.1890/04-0719>
- 841 Purandare, S., Tenhumberg, B., and Brisson, J. 2014. Comparison of the wing polyphenic response of  
842 pea aphids (*Acyrtosiphon pisum*) to crowding and predator cues. *Ecol. Entomol.* **39**: 263–266.  
843 <http://dx.doi.org/10.1111/een.12080>
- 844 R Core Team (2016) *R: A language and environment for statistical computing*. R Foundation for  
845 Statistical Computing, Vienna, Austria. (<http://www.R-project.org>)



- 846 Riddick, E. 2017. Identification of conditions for successful aphid control by ladybirds in  
847 greenhouses. *Insects* **8**: 38. <http://dx.doi.org/10.3390/insects8020038>
- 848 Roitberg, B., Myers, J., and Frazer, B. 1979. The influence of predators on the movement of apterous  
849 pea aphids between plants. *J. Anim. Ecol.* **48**: 111–122.  
850 <http://dx.doi.org/10.1126/science.aaj163110.2307/4104>
- 851 Roslin, T., Hardwick, B., Novotny, V., et al. 2017. Higher predation risk for insect prey at low  
852 latitudes and elevations. *Science* **356**: 742–744. <http://dx.doi.org/10.1126/science.aaj1631>
- 853 Shalter, M. 1984. Predator-prey behaviour and habituation. *In Habituation, sensitization, and*  
854 *behaviour*. Edited by H. Peeke and L. Petrinovich. Orlando: Academic Press. pp. 349–391.
- 855 Sih, A. 1992. Prey Uncertainty and the balancing of antipredator and feeding needs. *Am. Nat.* **139**:  
856 1052–1069. <http://dx.doi.org/10.1086/285372>
- 857 Sih, A. 1994. Predation risk and the evolutionary ecology of reproductive behaviour. *J. Fish Biol.* **45**:  
858 111–130. <http://dx.doi.org/10.1111/j.1095-8649.1994.tb01087.x>
- 859 Sih, A. 1997. To hide or not to hide? Refuge use in a fluctuating environment. *Trends Ecol. Evol.* **12**:  
860 375–376. [http://dx.doi.org/10.1016/S0169-5347\(97\)87376-4](http://dx.doi.org/10.1016/S0169-5347(97)87376-4)
- 861 Sih, A., Ziemba, R., and Harding, K. 2000. New insights on how temporal variation in predation risk  
862 shapes prey behavior. *Trends Ecol. Evol.* **15**: 3–4.  
863 [http://dx.doi.org/10.1016/S0169-5347\(99\)01766-8](http://dx.doi.org/10.1016/S0169-5347(99)01766-8)
- 864 Steffan, S., and Snyder, W. 2010. Cascading diversity effects transmitted exclusively by behavioral  
865 interactions. *Ecology* **91**: 2242–2252. <http://dx.doi.org/10.1890/09-0787.1>
- 866 Tamai, K., and Choh, Y. 2019. Previous exposures to cues from conspecifics and ladybird beetles  
867 prime antipredator responses in pea aphids *Acyrtosiphon pisum* (Hemiptera: Aphididae). *Appl.*  
868 *Entomol. Zool.* **54**: 277–283. <https://doi.org/10.1007/s13355-019-00623-3>
- 869 Trussell, G., Matassa, C., and Luttbeg, B. 2011. The effects of variable predation risk on foraging and  
870 growth: Less risk is not necessarily better. *Ecology* **92**: 1799–1806.  
871 <http://dx.doi.org/10.1890/10-2222.1>
- 872 Turner, A. 1997. Contrasting short-term and long-term effects of predation risk on consumer  
873 habitat use and resources. *Behav. Ecol.* **8**: 120–125.  
874 <http://dx.doi.org/10.1093/beheco/8.2.120>
- 875 Van Dievel, M., Janssens, L., and Stoks, R. 2016. Short- and long-term behavioural, physiological and  
876 stoichiometric responses to predation risk indicate chronic stress and compensatory  
877 mechanisms. *Oecologia* **181**: 347–357. <http://dx.doi.org/10.1007/s00442-015-3440-1>

- 878 Villagra, C., Ramírez, C., and Niemeyer, H. 2002. Antipredator responses of aphids to parasitoids  
879 change as a function of aphid physiological state. *Anim. Behav.* **64**: 677–683.  
880 <http://dx.doi.org/10.1006/anbe.2002.4015>
- 881 Weisser, W., Braendle, C., and Minoretti, N. 1999. Predator-induced morphological shift in the pea  
882 aphid. *Proc. Royal Soc. B.* **266**: 1175–1181. <http://dx.doi.org/10.1098/rspb.1999.0760>
- 883 Whitman, D., Agrawal, A. 2009. What is phenotypic plasticity and why is it important? In *Phenotypic*  
884 *plasticity of insects: mechanisms and consequences*. Edited by D. Whitman and T.  
885 Ananthakrishnan. Science Publishers: Enfield. pp. 1–63.
- 886 Youren, F. 2012. *Responses of aphids to semiochemicals released from ladybirds*. SLU, Swedish  
887 University of Agricultural Sciences, Faculty of Natural Resources and Agricultural  
888 Sciences, Department of Ecology. Available at: <https://stud.epsilon.slu.se/4633/>
- 889 Zöttl, M., Lienert, R., Clutton-brock, M., Millesi, E., and Manser, M. 2013. The effects of recruitment to  
890 direct predator cues on predator responses in meerkats. *Behav. Ecol.* **24**: 198–204.  
891 <http://dx.doi.org/10.1093/beheco/ars154>  
892
